# Supplementary material
Source: publisher site journal article supplement (http://www.apsnet.org/meetings/mtngwshops/NPDRS/Documents/2006/Appendix7.pdf)
Supplement: Supplementary file 1 [file Appendix7.pdf]

# Rating Matrix

## Pathways

S  
e  
c  
t  
o  
r  
s

|                       | Accidental-<br>Natural | Accidental<br>-Trade,<br>etc | Deliberate | Deliberate-<br>Toxins | Deliberate-<br>GEM |
|-----------------------|------------------------|------------------------------|------------|-----------------------|--------------------|
| Import                |                        |                              |            |                       |                    |
| Field Production      |                        |                              |            |                       |                    |
| Storage/<br>Transport |                        |                              |            |                       |                    |
| Export                |                        |                              |            |                       |                    |

3=High

2=Medium

1=Low

# Criteria Sets of High Priority

## Conveyance (Pathways)

I  
m  
p  
a  
c  
t

|                          | Accidental | Deliberate |
|--------------------------|------------|------------|
| Production               | X          | X          |
| Trade                    | X          | X          |
| Psychological/<br>Health | NA         | X          |
